# Supplementary material for: Modelling the effectiveness of GLOF DRM measures – a case study from the Ala-Archa valley, Kyrgyz Republic
Source: Copernicus journal article supplement (doi:10.5194/nhess-26-733-2026), 2026-02-06
Supplement: Supplementary file 1 [file Supplementary_material1.xlsx]

## Sheet: Lake Aksay
General	Project name	baseline_up_aksay	baseline_mid	baseline_low	baseline_up_aksay	baseline_mid	baseline_low	drainage_up	drainage_mid	drainage_low	baseline_up	baseline_mid	baseline_low	baseline_up	baseline_mid	retention_low	baseline_up	baseline_mid	retention_low	deflection_conti_up	deflection_conti_mid	deflection_conti_low	deflection_conti_up	deflection_conti_mid	deflection_conti_low
	Description	Medium scenario baseline simulation with no DRM measure implemented for the upstream section of lake Aksay	Medium scenario baseline simulation with no DRM measure implemented for the middle section of lake Aksay	Medium scenario baseline simulation with no DRM measure implemented for the downstream section of lake Aksay	Large scenario baseline simulation with no DRM measure implemented for the upstream section of lake Aksay	Large scenario baseline simulation with no DRM measure implemented for the middle section of lake Aksay	Large scenario baseline simulation with no DRM measure implemented for the downstream section of lake Aksay	Medium scenario simulation with partial lake drainage for the upstream section of lake Aksay	Medium scenario simulation with partial lake drainage for the middle section of lake Aksay	Medium scenario simulation with partial lake drainage for the downstream section of lake Aksay	Large scenario simulation with partial lake drainage for the upstream section of lake Aksay	Large scenario simulation with partial lake drainage for the middle section of lake Aksay	Large scenario simulation with partial lake drainage for the downstream section of lake Aksay	Medium scenario simulation with the retention basin for the upstream section of lake Aksay	Medium scenario simulation with the retention basin for the middle section of lake Aksay	Medium scenario simulation with the retention basin for the downstream section of lake Aksay	Large scenario simulation with the retention basin for the upstream section of lake Aksay	Large scenario simulation with the retention basin for the middle section of lake Aksay	Large scenario simulation with the retention basin for the downstream section of lake Aksay	Medium scenario simulation with the deflection dam for the upstream section of lake Aksay	Medium scenario simulation with the deflection dam for the middle section of lake Aksay	Medium scenario simulation with the deflection dam for the downstream section of lake Aksay	Large scenario simulation with the deflection dam for the upstream section of lake Aksay	Large scenario simulation with the deflection dam for the middle section of lake Aksay	Large scenario simulation with the deflection dam for the downstream section of lake Aksay
	DRM	none	none	none	none	none	none	partial lake drainage	partial lake drainage	partial lake drainage	partial lake drainage	partial lake drainage	partial lake drainage	*none	*none	retention basin	*none	*none	retention basin	retention basin	retention basin	retention basin	retention basin	retention basin	retention basin
	Scenario	Aksay historical volume	Aksay historical volume	Aksay historical volume	Aksay large volume	Aksay large volume	Aksay large volume	Aksay historical volume	Aksay historical volume	Aksay historical volume	Aksay historical volume	Aksay historical volume	Aksay historical volume	Aksay historical volume	Aksay historical volume	Aksay historical volume	Aksay large volume	Aksay large volume	Aksay large volume	Aksay historical volume	Aksay historical volume	Aksay historical volume	Aksay large volume	Aksay large volume	Aksay large volume
	Calculation Domain	calc_ak_up.shp	calc_mid.shp	calc_KS_downstr	calc_ak_up.shp	calc_mid.shp	calc_KS_downstr	calc_ak_up.shp	calc_mid.shp	calc_KS_downstr	calc_ak_up.shp	calc_mid.shp	calc_KS_downstr	calc_ak_up.shp	calc_mid.shp	calc_envelope_low.shp	calc_ak_up.shp	calc_mid.shp	calc_envelope_low.shp	calc_ak_up.shp	calc_mid.shp	calc_KS_downstr	calc_ak_up.shp	calc_mid.shp	calc_envelope_low.shp
	Digital Elevation Info	DEM_baseline_lo-res	DEM_baseline_lo-res	DEM_baseline_hi-res	DEM_baseline_lo-res	DEM_baseline_lo-res	DEM_baseline_hi-res	DEM_baseline_lo-res	DEM_baseline_lo-res	DEM_baseline_hi-res	DEM_baseline_lo-res	DEM_baseline_lo-res	DEM_baseline_hi-res	DEM_baseline_lo-res	DEM_baseline_lo-res	DEM_exca10_hi-res	DEM_baseline_lo-res	DEM_baseline_lo-res	DEM_exca10_hi-res	DEM_deflect8_hi-res	DEM_baseline_lo-res	DEM_baseline_hi-res	DEM_deflect8_hi-res	DEM_baseline_lo-res	DEM_baseline_hi-res
	Select OUTPUT filename	baseline_hist_ak_up	baseline_hist_ak_mid	baseline_hist_ak_low	baseline_large_ak_up	baseline_large_ak_mid	baseline_large_ak_low	drainage_hist_ak_up	drainage_hist_ak_mid	drainage_hist_ak_low	baseline_hist_ak_up	baseline_hist_ak_mid	baseline_hist_ak_low	baseline_hist_ak_up	baseline_hist_ak_mid	retention_hist_ak_low	baseline_large_ak_up	baseline_large_ak_mid	retention_large_ak_low	deflection_conti_hist_ak_up	deflection_conti_hist_ak_mid	deflection_conti_hist_ak_low	deflection_conti_large_ak_up	deflection_conti_large_ak_mid	deflection_conti_large_ak_low
Parameters	DEM resolution (m)	12.5	12.5	3.125	12.5	12.5	3.125	12.5	12.5	3.125	12.5	12.5	3.125	12.5	12.5	3.125	12.5	12.5	3.125	3.125	12.5	3.125	3.125	12.5	3.125
	Simulation resolution (m)	12.5	12.5	3.125	12.5	12.5	3.125	12.5	12.5	3.125	12.5	12.5	3.125	12.5	12.5	3.125	12.5	12.5	3.125	3.125	12.5	3.125	3.125	12.5	3.125
	End time (s)	30000	30000	30000	30000	30000	30000	30000	30000	30000	30000	30000	30000	30000	30000	30000	30000	30000	30000	30000	30000	30000	30000	30000	30000
	Dump step (s)	200	200	200	200	200	200	200	200	200	200	200	200	200	200	200	200	200	200	200	200	200	200	200	200
	Density (kg/m^3)	1800	1100	1100	1800	1100	1100	1800	1100	1100	1800	1100	1100	1800	1100	1100	1800	1100	1100	1800	1100	1100	1800	1100	1100
	Lambda	1	1	1	1	1	1	1	1	1	1	1	1	1	1	1	1	1	1	1	1	1	1	1	1
	Numerical scheme	SecondOrder	SecondOrder	SecondOrder	SecondOrder	SecondOrder	SecondOrder	SecondOrder	SecondOrder	SecondOrder	SecondOrder	SecondOrder	SecondOrder	SecondOrder	SecondOrder	SecondOrder	SecondOrder	SecondOrder	SecondOrder	SecondOrder	SecondOrder	SecondOrder	SecondOrder	SecondOrder	SecondOrder
	H cutoff	1e-06	1e-06	1e-06	1e-06	1e-06	1e-06	1e-06	1e-06	1e-06	1e-06	1e-06	1e-06	1e-06	1e-06	1e-06	1e-06	1e-06	1e-06	1e-06	1e-06	1e-06	1e-06	1e-06	1e-06
	Percentage of Total Momentum	5	5	5	5		5	5	5	5	5		5	5	5	5	5		5	5	5	5	5		5
Friction	Global Mu (-)	0.1	0.1	0.1	0.05	0.05	0.05	0.1	0.1	0.1	0.1	0.1	0.1	0.1	0.1	0.1	0.05	0.05	0.05	0.1	0.1	0.1	0.05	0.05	0.05
	Global Xi (m/s2)	400	400	400	400	400	400	400	400	400	400	400	400	400	400	400	400	400	400	400	400	400	400	400	400
	1st Additional MuXi-polygon	add_muxi_ak.shp	add_muxi_ak.shp	add_muxi_ak.shp	add_muxi_ak.shp	add_muxi_ak.shp	add_muxi_ak.shp	add_muxi_ak.shp	add_muxi_ak.shp	add_muxi_ak.shp	add_muxi_ak.shp	add_muxi_ak.shp	add_muxi_ak.shp	add_muxi_ak.shp	add_muxi_ak.shp	add_muxi_ak.shp	add_muxi_ak.shp	add_muxi_ak.shp	add_muxi_ak.shp	add_muxi_ak.shp	add_muxi_ak.shp	add_muxi_ak.shp	add_muxi_ak.shp	add_muxi_ak.shp	add_muxi_ak.shp
	1st Additional Mu (-)	0.01	0.01	0.01	0.01	0.01	0.01	0.01	0.01	0.01	0.01	0.01	0.01	0.01	0.01	0.01	0.01	0.01	0.01	0.01	0.01	0.01	0.01	0.01	0.01
	1st Additional Xi (m/s2)	400	400	400	400	400	400	400	400	400	400	400	400	400	400	400	400	400	400	400	400	400	400	400	400
Hydrograph	Hydrograph/Release shapefile	release_ak.shp	release_mid.shp	release_low.shp	release_ak.shp	release_mid.shp	release_low.shp	release_ak.shp	release_mid.shp	release_low.shp	release_ak.shp	release_mid.shp	release_low.shp	release_tz.shp	release_mid.shp	release_low.shp	release_ak.shp	release_mid.shp	release_low.shp	release_ak.shp	release_mid.shp	release_low.shp	release_ak.shp	release_mid.shp	release_low.shp
	Vol (m3)	200000	653000	476500	300000	806000	615000	100000	444000	295000	200000	653000	476500	200000	653000	476500	300000	806000	615000	200000	420000	201500	300000	750000	705000
	Q	350	0, 950, 520, 255, 0	0, 345, 300, 175, 0	500	0, 1250, 690, 350, 0	0, 465, 420, 225, 0	200	0, 760, 515, 315, 180, 0	0, 225, 200, 110, 0	350	0, 950, 520, 255, 0	0, 345, 300, 175, 0	350	0, 950, 520, 255, 0	0, 345, 300, 175, 0	500	0, 1250, 690, 350, 0	0, 465, 420, 225, 0	350	0, 360, 300, 190, 0	0, 175, 185, 0	500	0, 320, 560, 260, 145, 0	0, 430, 380, 210, 110, 0
	t (s)	300, 1143	0, 200, 400, 1000, 2400	0, 200, 400, 1400, 3000	300, 1200	0, 200, 400, 1000, 2000	0, 200, 400, 1400, 2800	200, 1000	0, 200, 400, 600, 800, 2000	0, 200, 400, 1600, 2400	350, 1333	0, 200, 400, 1000, 2400	0, 200, 400, 1400, 3000	300, 1333	0, 200, 400, 1000, 2400	0, 200, 400, 1400, 3000	300, 1200	0, 200, 400, 1000, 2000	0, 200, 400, 1400, 2800	300, 1143	0, 200, 400, 1000, 2800	0, 200, 400, 2000	300, 1200	0, 200, 400, 1400, 2200, 3000	0, 200, 400, 1800, 3200, 3400
	v (m/s)	0	0	5	-	0	5	0	0	5	0	0	5	0	0	5	0	0	5	0	0	5	0	0	5
	Inflow direction (degrees)	130	80	50	130	80	50	130	80	50	130	80	50	130	80	50	130	80	50	130	80	50	130	80	50
Erosion	Define local erosion areas	yes	no	no	yes	no	no	yes	no	no	yes	no	no	yes	no	no	yes	no	no	yes	no	no	yes	no	no
	1st additional EROSION Polygon	erosion_ak.shp	-	-	erosion_ak.shp	-	-	erosion_ak.shp	-	-	erosion_ak.shp	-	-	erosion_ak.shp	-	-	erosion_ak.shp	-	-	erosion_ak.shp	-	-	erosion_ak.shp	-	-
	Max. erosion depth (m)	5	-	-	5	-	-	5	-	-	5	-	-	5	-	-	5	-	-	5	-	-	5	-	-
	Erosion Density Rho:	1800	-	-	1800	-	-	1800	-	-	1800	-	-	1800	-	-	1800	-	-	1800	-	-	1800	-	-
	Erosion rate (m/s)	normal	-	-	normal	-	-	normal	-	-	normal	-	-	normal	-	-	normal	-	-	normal	-	-	normal	-	-
	Pot. Erosion depth (per kPa)	deep	-	-	deep	-	-	deep	-	-	deep	-	-	deep	-	-	deep	-	-	deep	-	-	deep	-	-
	Critical shear stress (kPa)	medium	-	-	medium	-	-	medium	-	-	medium	-	-	medium	-	-	medium	-	-	medium	-	-	medium	-	-

## Sheet: Lake Teztor
General	Project name	baseline_up-mid_Teztor	baseline_low	baseline_up-mid_Teztor	baseline_low	drainage_up-mid	drainage_low	baseline_up-mid	baseline_low	baseline_up-mid	retention_low	baseline_up-mid	retention_low	deflection_up-mid	deflection_low	deflection_up-mid	deflection_low
	Description	Medium scenario baseline simulation with no DRM measure implemented for the upstream and middle section of lake Teztor	Medium scenario baseline simulation with no DRM measure implemented for the downstream section of lake Teztor	Large scenario baseline simulation with no DRM measure implemented for the upstream and middle section of lake Teztor	Large scenario baseline simulation with no DRM measure implemented for the downstream section of lake Teztor	Medium scenario simulation with partial lake drainage for the upstream and middle section of lake Teztor	Medium scenario simulation with partial lake drainage for the downstream section of lake Teztor	Large scenario simulation with partial lake drainage for the upstream and middle section of lake Teztor	Large scenario simulation with partial lake drainage for the downstream section of lake Teztor	Medium scenario simulation with the retention basin for the upstream and middle section of lake Teztor	Medium scenario simulation with the retention basin for the downstream section of lake Teztor	Large scenario simulation with the retention basin for the upstream and middle section of lake Teztor	Large scenario simulation with the retention basin for the downstream section of lake Teztor	Medium scenario baseline simulation with no DRM measure implemented for the upstream and middle section of lake Teztor, as the deflection dam has no influence for a GLOF from lake Teztor	Medium scenario baseline simulation with no DRM measure implemented for the downstream section of lake Teztor, as the deflection dam has no influence for a GLOF from lake Teztor	Large scenario baseline simulation with no DRM measure implemented for the upstream and middle section of lake Teztor, as the deflection dam has no influence for a GLOF from lake Teztor	Large scenario baseline simulation with no DRM measure implemented for the downstream section of lake Teztor, as the deflection dam has no influence for a GLOF from lake Teztor
	DRM	none	none	none	none	partial lake drainage	partial lake drainage	partial lake drainage	partial lake drainage	retention basin	retention basin	retention basin	retention basin	deflection dam	deflection dam	deflection dam	deflection dam
	Scenario	teztor historical volume	teztor historical volume	teztor large volume	teztor large volume	teztor historical volume	teztor historical volume	teztor historical volume	teztor historical volume	teztor historical volume	teztor historical volume	teztor large volume	teztor large volume	teztor historical volume	teztor historical volume	teztor large volume	teztor large volume
	Calculation Domain	calc_tz_upmid.shp	calc_KS_downstr	calc_tz_upmid.shp	calc_KS_downstr	calc_tz_upmid.shp	calc_KS_downstr	calc_tz_upmid.shp	calc_KS_downstr	calc_tz_upmid.shp	calc_envelope_low.shp	calc_tz_upmid.shp	calc_KS_downstr	calc_tz_upmid.shp	calc_KS_downstr	calc_tz_upmid.shp	calc_KS_downstr
	Digital Elevation Info	DEM_baseline_lo-res	DEM_baseline_hi-res	DEM_baseline_lo-res	DEM_baseline_hi-res	DEM_baseline_lo-res	DEM_baseline_hi-res	DEM_baseline_lo-res	DEM_baseline_hi-res	DEM_baseline_lo-res	DEM_exca10_hi-res	DEM_baseline_lo-res	DEM_exca10_hi-res	DEM_baseline_lo-res	DEM_baseline_hi-res	DEM_baseline_lo-res	DEM_baseline_hi-res
	Select OUTPUT filename	baseline_hist_tz_upmid	baseline_hist_tz_low	baseline_large_tz_upmid	baseline_large_tz_low	drainage_hist_tz_upmid	drainage_hist_tz_low	baseline_hist_tz_upmid	baseline_hist_tz_low	baseline_hist_tz_upmid	retention_hist_tz_low	baseline_large_tz_upmid	retention_large_tz_low	baseline_hist_tz_upmid	baseline_hist_tz_low	baseline_large_tz_upmid	baseline_large_tz_low
Parameters	DEM resolution (m)	12.5	3.125	12.5	3.125	12.5	3.125	12.5	3.125	12.5	3.125	12.5	3.125	12.5	3.125	12.5	3.125
	Simulation resolution (m)	12.5	3.125	12.5	3.125	12.5	3.125	12.5	3.125	12.5	3.125	12.5	3.125	12.5	3.125	12.5	3.125
	End time (s)	30000	30000	30000	30000	30000	30000	30000	30000	30000	30000	30000	30000	30000	30000	30000	30000
	Dump step (s)	200	200	200	200	200	200	200	200	200	200	200	200	200	200	200	200
	Density (kg/m^3)	1400	1100	1400	1100	1400	1100	1400	1100	1400	1100	1400	1100	1400	1100	1400	1100
	Lambda	1	1	1	1	1	1	1	1	1	1	1	1	1	1	1	1
	Numerical scheme	SecondOrder	SecondOrder	SecondOrder	SecondOrder	SecondOrder	SecondOrder	SecondOrder	SecondOrder	SecondOrder	SecondOrder	SecondOrder	SecondOrder	SecondOrder	SecondOrder	SecondOrder	SecondOrder
	H cutoff	1e-06	1e-06	1e-06	1e-06	1e-06	1e-06	1e-06	1e-06	1e-06	1e-06	1e-06	1e-06	1e-06	1e-06	1e-06	1e-06
	Percentage of Total Momentum	5	5	5	5	5	5	5	5	5	5	5	5	5	5	5	5
Friction	Global Mu (-)	0.1	0.1	0.05	0.05	0.1	0.1	0.1	0.1	0.1	0.1	0.05	0.05	0.1	0.1	0.05	0.05
	Global Xi (m/s2)	400	400	400	400	400	400	400	400	400	400	400	400	400	400	400	400
	1st Additional MuXi-polygon	add_muxi_tz.shp	add_muxi_tz.shp	add_muxi_tz.shp	add_muxi_tz.shp	add_muxi_tz.shp	add_muxi_tz.shp	add_muxi_tz.shp	add_muxi_tz.shp	add_muxi_tz.shp	add_muxi_tz.shp	add_muxi_tz.shp	add_muxi_tz.shp	add_muxi_tz.shp	add_muxi_tz.shp	add_muxi_tz.shp	add_muxi_tz.shp
	1st Additional Mu (-)	0.01	0.01	0.01	0.01	0.01	0.01	0.01	0.01	0.01	0.01	0.01	0.01	0.01	0.01	0.01	0.01
	1st Additional Xi (m/s2)	400	400	400	400	400	400	400	400	400	400	400	400	400	400	400	400
Hydrograph	Hydrograph/Release shapefile	release_tz.shp	release_low.shp	release_tz.shp	release_low.shp	release_tz.shp	release_low.shp	release_tz.shp	release_low.shp	release_tz.shp	release_low.shp	release_tz.shp	release_low.shp	release_tz.shp	release_low.shp	release_tz.shp	release_low.shp
	Vol (m3)	100000	334000	400000	1123000	50000	322000	100000	334000	100000	334000	400000	1123000	100000	334000	400000	1123000
	Q	200	0,330,270,160,0	650	0, 630, 560, 490, 320, 160,0	100	0, 230, 115, 80	200	0,330,270,160,0	200	0,330,270,160,0	650	0, 630, 560, 490, 320, 160, 0	200	0,330,270,160,0	650	0, 630, 560, 490, 320, 160,0
	t (s)	200, 1000	0, 200,400, 1000, 2400	300, 1230	0, 200, 400, 600, 1400, 3000, 4600	200, 1000	0, 200, 1600, 2600	200, 1000	0, 200,400, 1000, 2400	200, 1000	0, 200, 400, 1000, 2400	300, 1230	0, 200, 400, 600, 1400, 3000, 4600	200, 1000	0, 200,400, 1000, 2400	300, 1230	0, 200, 400, 600, 1400, 3000, 4600
	v (m/s)	0	5	0	5	0	5	0	5	0	5	0	5	0	5	0	5
	Inflow direction (degrees)	70	50	70	50	70	50	70	50	70	50	70	50	70	50	70	50
Erosion	Define local erosion areas	yes	no	yes	no	yes	no	yes	no	yes	no	yes	no	yes	no	yes	no
	1st additional EROSION Polygon	erosion_tz.shp	-	erosion_tz.shp	-	erosion_tz.shp	-	erosion_tz.shp	-	erosion_tz.shp	-	erosion_tz.shp	-	erosion_tz.shp	-	erosion_tz.shp	-
	Max. erosion depth (m)	5	-	5	-	5	-	5	-	5	-	5	-	5	-	5	-
	Erosion Density Rho:	1800	-	1800	-	1800	-	1800	-	1800	-	1800	-	1800	-	1800	-
	Erosion rate (m/s)	normal	-	normal	-	normal	-	normal	-	normal	-	normal	-	normal	-	normal	-
	Pot. Erosion depth (per kPa)	deep	-	deep	-	deep	-	deep	-	deep	-	deep	-	deep	-	deep	-
	Critical shear stress (kPa)	medium	-	medium	-	medium	-	medium	-	medium	-	medium	-	medium	-	medium	-
