# Supplementary material for: Modelling the effectiveness of GLOF DRM measures – a case study from the Ala-Archa valley, Kyrgyz Republic
Source: Copernicus journal article supplement (doi:10.5194/nhess-26-733-2026), 2026-02-06
Supplement: Supplementary file [file nhess-26-733-2026-supplement-title-page.pdf › nhess-26-733-2026-supplement-title-page.pdf]

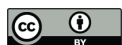

*Supplement of*

## **Modelling the effectiveness of GLOF DRM measures – a case study from the Ala-Archa valley, Kyrgyz Republic**

**Laura Niggli et al.**

*Correspondence to:* Laura Niggli ([laura.niggli@geo.uzh.ch](mailto:laura.niggli@geo.uzh.ch))

- [nhess-26-733-2026-supplement-title-page.pdf](#)
- [Supplementary\\_material1.xlsx](#)

The copyright of individual parts of the supplement might differ from the article licence.
